# Supplementary material for: Blood pressure–associated polymorphism controls ARHGAP42 expression via serum response factor DNA binding
Source: JCI journal article supplement (doi:10.1172/jci88899), 2017-01-22
Supplement: sd1 [file 1]

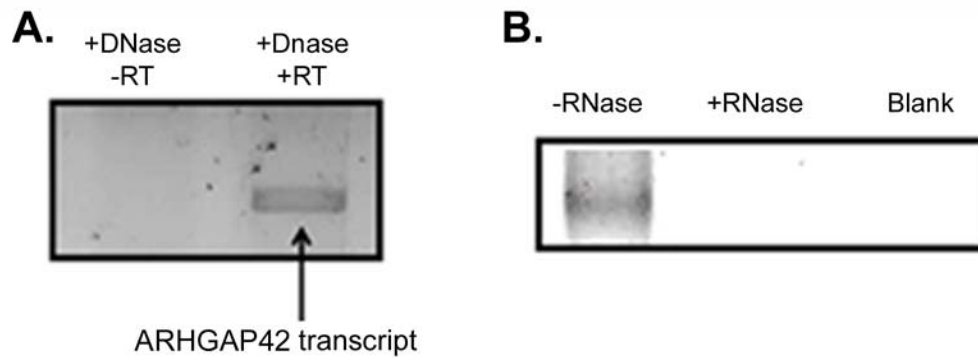

**Supplemental Figure I. RNA used for allele-specific qPCR was not contaminated with genomic DNA. A)** Total RNA isolated from HuAoSMC was treated with DNase and then subjected to first strand synthesis +/- reverse transcriptase (RT). Reaction products were then used for PCR amplification of a 604 bp region encompassing the DHS2 region of the *ARHGAP42* gene. **B)** Same as A, except that one RNA sample was treated with RNase before first strand synthesis. Data are representative of two separate experiments.

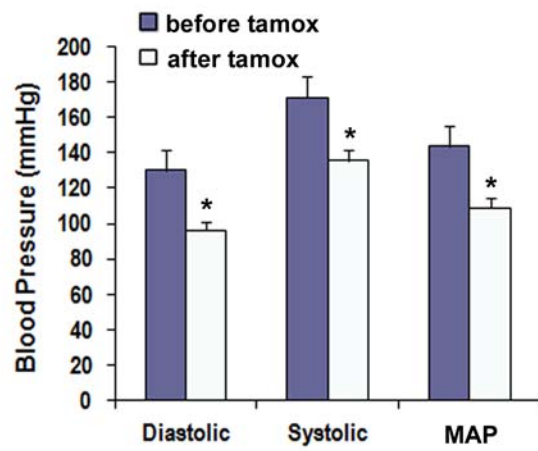

**Supplemental Figure II. Tamoxifen treatment of *Arhgap42*<sup>et/et</sup>SM-MHC<sup>creERT2</sup> mice restored blood pressure homeostasis.** Blood pressure was measured by tail cuff method before and two weeks after the start of tamoxifen treatment (100 mg/kg IP for 5 consecutive days). Data are expressed as mean  $\pm$  SEM; n=5\* p<0.05 vs before tamoxifen (student's t-test 2 tailed).

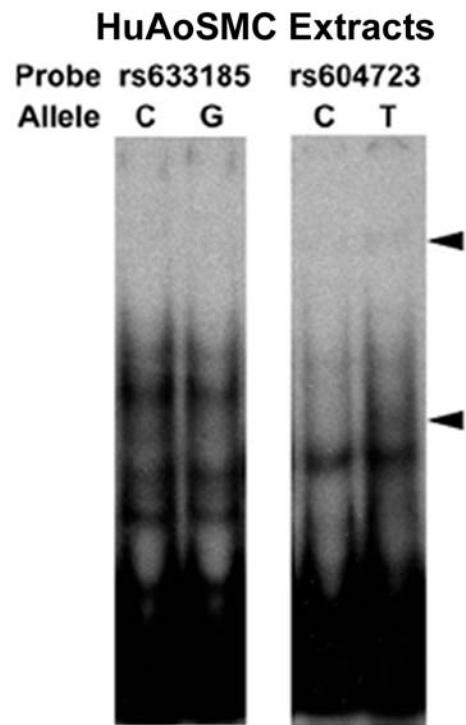

**Supplemental Figure III.** Gel shift assays were performed by combining nuclear lysates from HuAoSMC with radiolabeled 100 bp oligonucleotide probes containing the major or minor alleles at rs633185 and rs604723. Arrowheads mark allele-specific bands. Gel is representative of two individual experiments.

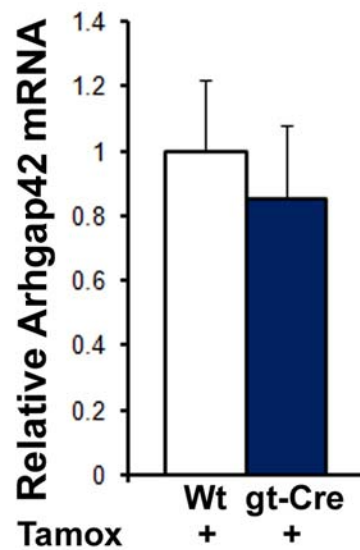

**Supplemental Figure IV. Tamoxifen treatment of DOCA-salt-treated *Arhgap42*<sup>tg/tg</sup>*SMMHC*<sup>creERT2</sup> mice restored *ARHGAP42* expression in mesenteric arteries.** *Wt* and *Arhgap42*<sup>tg/tg</sup>*SMMHC*<sup>creERT2</sup> mice were implanted with a 50mg slow-release DOCA pellet and then fed 0.9% NaCl in drinking water for 3 weeks. Ten days after the start of the DOCA-salt regimen, both groups were treated with tamoxifen by oral gavage of 1 mg for 3 consecutive days. Mice were sacrificed 12d after the start of tamoxifen treatment and *Arhgap42* message was measured in isolated mesenteric arteries by qPCR. *ARHGAP42* expression was normalized to *GAPDH* and is expressed relative to *Wt*. Data are expressed as mean  $\pm$  SEM; n=5 for *Wt*; n=7 for *Arhgap42*<sup>tg/tg</sup>*SMMHC*<sup>creERT2</sup> mice, p=0.6595 (student's t-test).

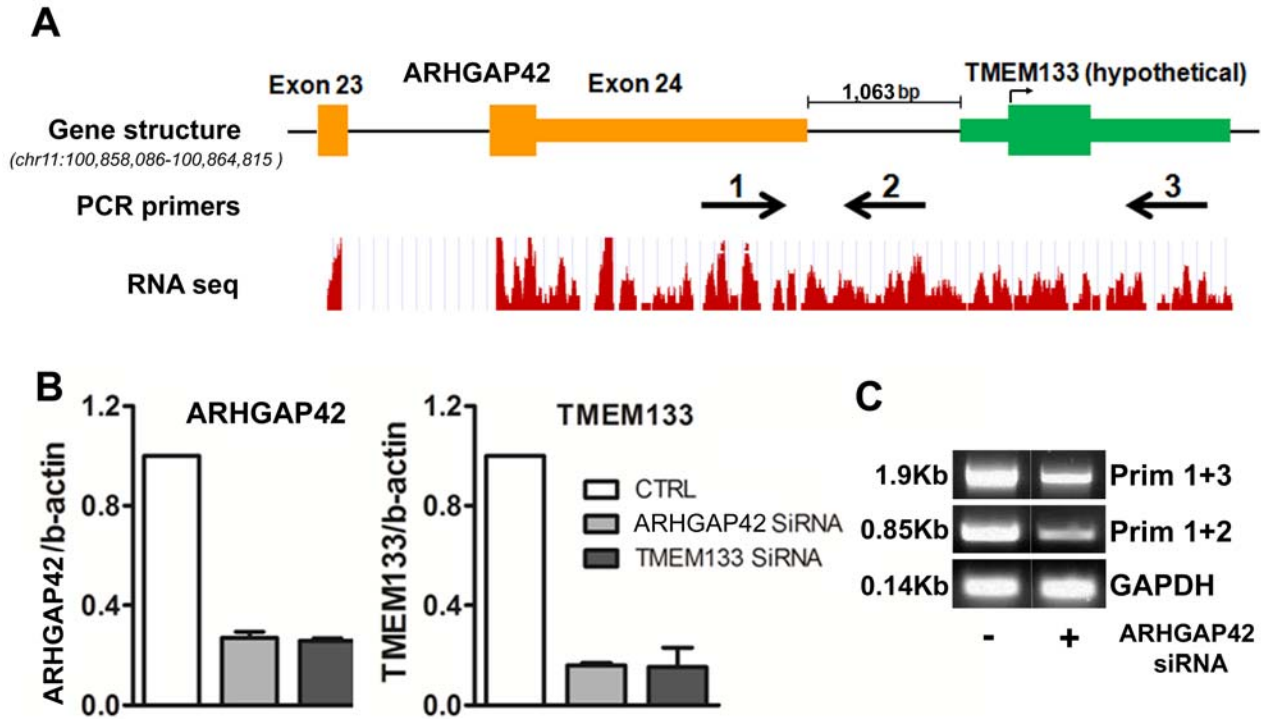

**Supplemental Figure V. *TMEM133* is an extension of the *ARHGAP42* 3'UTR. A)** RNAseq data from HuAoSMC near the genomic region containing *TMEM133*. **B)** siRNA targeted against *ARHGAP42* or *TMEM133* had identical effects on *ARHGAP42* and *TMEM133* mRNA levels as measured by qPCR. Data are expressed as mean  $\pm$  SEM of three independent experiments. **C)** mRNA was isolated from HuAoSMCs +/- siRNA to *ARHGAP42*. Following DNase treatment, RT PCR was performed using the primers shown in A. Data represent three independent experiments.

| <b>Characteristic</b>                      | <b>Mean <math>\pm</math> SD or percent</b> |
|--------------------------------------------|--------------------------------------------|
| Age, mean (yrs)                            | 48 $\pm$ 12                                |
| Age category, %                            |                                            |
| 30-44 yrs                                  | 44                                         |
| 45-64 yrs                                  | 45                                         |
| 65+ yrs                                    | 11                                         |
| % female                                   | 53                                         |
| Race, %                                    |                                            |
| White                                      | 77                                         |
| Black                                      | 19                                         |
| Other                                      | 4                                          |
| Body mass index, mean (kg/m <sup>2</sup> ) | 29 $\pm$ 6                                 |
| Body mass index category, %                |                                            |
| Normal                                     | 27                                         |
| Overweight                                 | 36                                         |
| Obese                                      | 38                                         |
| Total cholesterol (mg/dl), mean            | 200 $\pm$ 38                               |
| Current smoker, %                          | 7                                          |
| Office systolic BP (mm Hg), mean           | 130 $\pm$ 13                               |
| Office diastolic BP (mm Hg), mean          | 81 $\pm$ 9                                 |
| Clinic hypertension, %                     | 29                                         |

SD, standard deviation

**Supplemental Table I. Characteristics of clinical cohort**

| <b>rs604723</b>  | <b>C/C</b> | <b>C/T</b> | <b>T/T</b> | <b>MAF</b> |
|------------------|------------|------------|------------|------------|
| African American | 326        | 32         | 0          | *4.5%      |
| Caucasian        | 359        | 274        | 40         | 26.3%      |

  

| <b>rs2055450</b> | <b>A/A</b> | <b>A/T</b> | <b>T/T</b> | <b>MAF</b> |
|------------------|------------|------------|------------|------------|
| African American | 311        | 47         | 0          | *6.6%      |
| Caucasian        | 346        | 290        | 37         | 27.0%      |

  

| <b>rs604723 vs rs2055450</b> | <b>LD</b>            | <b>LD</b> |
|------------------------------|----------------------|-----------|
|                              | <b>r<sup>2</sup></b> | <b>D'</b> |
| African American             | 0.56                 | 0.89      |
| Caucasian                    | 0.83                 | 0.92      |

**Supplemental Table II. Analysis of *ARHGAP42* genotype in human populations.** 1,031 patients from several clinical cohorts were genotyped at the rs604723 and rs2055450 variations using Taqman-based allelic discrimination assays. Linkage disequilibrium for these variations was calculated using R. \* p<0.001 vs MAF in Caucasians; Chi-squared test.
